# Supplementary material
Source: HighWire-hosted journal article supplement (https://erj.ersjournals.com/content/57/5/2004165)
Supplement: inline-supplementary-material-1 [file inline-supplementary-material-1.pdf]

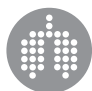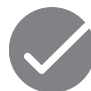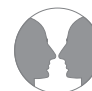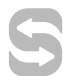

SHAREABLE PDF

# Collapse induration of alveoli is an ultrastructural finding in a COVID-19 patient

Matthias Ochs <sup>1,2,3</sup>, Sara Timm<sup>3</sup>, Sefer Elezkurtaj<sup>4</sup>, David Horst<sup>4</sup>, Jenny Meinhardt <sup>5</sup>, Frank L. Heppner<sup>5,6,7,8</sup>, Steffen Weber-Carstens <sup>9</sup>, Andreas C. Hocke<sup>2,10</sup> and Martin Witzenrath<sup>2,10</sup>

**Affiliations:** <sup>1</sup>Institute of Functional Anatomy, Charité – Universitätsmedizin Berlin, corporate member of Freie Universität Berlin and Humboldt-Universität zu Berlin, Berlin, Germany. <sup>2</sup>German Center for Lung Research (DZL), Berlin, Germany. <sup>3</sup>Core Facility Electron Microscopy, Charité – Universitätsmedizin Berlin, corporate member of Freie Universität Berlin and Humboldt-Universität zu Berlin, Berlin, Germany. <sup>4</sup>Dept of Pathology, Charité – Universitätsmedizin Berlin, corporate member of Freie Universität Berlin and Humboldt-Universität zu Berlin, Berlin, Germany. <sup>5</sup>Dept of Neuropathology, Charité – Universitätsmedizin Berlin, corporate member of Freie Universität Berlin and Humboldt-Universität zu Berlin, Berlin, Germany. <sup>6</sup>Berlin Institute of Health (BIH), Berlin, Germany. <sup>7</sup>Cluster of Excellence, NeuroCure, Berlin, Germany. <sup>8</sup>German Center for Neurodegenerative Diseases (DZNE) Berlin, Berlin, Germany. <sup>9</sup>Dept of Anesthesiology and Operative Intensive Care Medicine, Charité – Universitätsmedizin Berlin, corporate member of Freie Universität Berlin and Humboldt-Universität zu Berlin, Berlin, Germany. <sup>10</sup>Dept of Infectious Diseases and Respiratory Medicine, Division of Pulmonary Inflammation, Charité – Universitätsmedizin Berlin, corporate member of Freie Universität Berlin and Humboldt-Universität zu Berlin, Berlin, Germany.

**Correspondence:** Matthias Ochs, Institute of Functional Anatomy, Charité – Universitätsmedizin Berlin, Philippstr. 11, 10115 Berlin, Germany. E-mail: matthias.ochs@charite.de

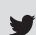

@ERSpublications

**Electron microscopy reveals collapse induration with alveolar epithelial cell death, basal lamina denudation, collapse and sealing of alveoli in a COVID-19 patient, implicating surfactant dysfunction and alveolar instability in fibrosis initiation** <https://bit.ly/38yEX2g>

**Cite this article as:** Ochs M, Timm S, Elezkurtaj S, *et al.* Collapse induration of alveoli is an ultrastructural finding in a COVID-19 patient. *Eur Respir J* 2021; 57: 2004165 [<https://doi.org/10.1183/13993003.04165-2020>].

This single-page version can be shared freely online.

## To the Editor:

The delicate alveolar blood–air barrier is a primary target in coronavirus disease 2019 (COVID-19). Its micro-architecture consists of an alveolar epithelium composed of type I and type II cells and covered with surfactant, a thin interstitium and a capillary endothelium. Of particular relevance for the pathogenesis of severe COVID-19 is the infection of type II alveolar epithelial cells [1]. Based on their dual function as producers of surfactant and as precursors for both epithelial cell types, surfactant alterations and aberrant epithelial regeneration can be expected.
